# Supplementary material
Source: HighWire-hosted journal article supplement (https://erj.ersjournals.com/content/56/1/1901926)
Supplement: inline-supplementary-material-1 [file inline-supplementary-material-1.pdf]

*Online-Only Supplements*

**Table E1. Modified Wood clinical asthma score (mWCAS).**

**Table E2. Severity at Failure and Reason for Failure according to Group.**

**Table E1. Modified Wood clinical asthma score (m-WCAS).**

|                          | <b>0</b>                             | <b>0,5</b>                                   | <b>1</b>                                            | <b>2</b>                                             |
|--------------------------|--------------------------------------|----------------------------------------------|-----------------------------------------------------|------------------------------------------------------|
| Cyanosis                 | SpO <sub>2</sub> >95%<br>in room air | 90%≤SpO <sub>2</sub> <95%<br><br>In room air | SpO <sub>2</sub> >95% with<br>FiO <sub>2</sub> >21% | SpO <sub>2</sub> < 95% with<br>FiO <sub>2</sub> >21% |
| Inspiratory breath       | Normal                               | Slightly unequal                             | Unequal                                             | Decreased or<br>absent                               |
| Accessory muscles<br>use | Absent                               | low                                          | Moderate                                            | Maximal                                              |
| Expiratory wheezing      | Absent                               | low                                          | Moderate                                            | Maximal                                              |
| Cerebral function        | Normal                               | Agited if disturbed                          | Depressed or<br>agitated                            | Coma                                                 |

The m-WCAS is a composite score assessing the severity of bronchiolitis through five components (cyanosis, inspiratory breath sounds, accessory muscles use, wheezing, and cerebral function). Each is rated from 0 to 2 for maximal value. A visual analog scale is used to standardize the scoring of accessory muscle use and wheezing.

**Table E2. Severity at Failure and Reason for Failure according to Group.**

| Characteristics                                                      | HFNC group<br>(N=133) | Control<br>group<br>(N=135) | Mean difference<br>(95% CI) | P<br>value  |
|----------------------------------------------------------------------|-----------------------|-----------------------------|-----------------------------|-------------|
| <b>Severity at failure</b>                                           |                       |                             |                             |             |
| no. (%)                                                              | 19                    | 27                          |                             |             |
| HR-bpm                                                               | 160±18                | 159±18                      | 0.8 (-10.3 to 12)           | ns          |
| RR-bpm                                                               | 58±14                 | 60±17                       | -1.5 (-11.1 to 8.05)        | ns          |
| SpO <sub>2</sub> -%                                                  | 96±3                  | 95±4                        | 0.6 (-1.8 to 3.1)           | ns          |
| P(t)CO <sub>2</sub> , Mean (SD)-mmHg                                 | 53±10                 | 66±9                        | -12.7 (-22.2 to -3.2)       | <b>0.01</b> |
| FiO <sub>2</sub> * or O <sub>2</sub> flow rate†                      | 33±8%                 | 1±0.7 L/min                 |                             | NA          |
| m-WCA score                                                          | 5.5±1.2               | 4.7±0.8                     | 0.7 (-0.005 to 1.4)         | ns          |
| <b>Reason for failure‡</b>                                           |                       |                             |                             |             |
| Apnea episode (> 3/h)                                                | 0                     | 1                           |                             | ND          |
| Increasing m-WCAS score (or > 6)                                     | 12                    | 20                          |                             | ns          |
| Increasing P(t)CO <sub>2</sub> (or > 70mmHg)                         | 3                     | 8                           |                             | ns          |
| FiO <sub>2</sub> or O <sub>2</sub> flow-rate exceeding 40% or 2L/min | 9                     | 8                           |                             | NA          |
| Apnea events                                                         | 1                     | 1                           |                             | ND          |

\* on HFNC group, †on control group, ‡ one or several, NA denote not applicable, ND not determined.

HFNC high-flow nasal cannula, m-WCAS modified Wood clinical asthma score
